# Supplementary material
Source: PubMed Central journal article supplement (PMC8419075)
Supplement: NIHMS1731494-supplement-1.pdf [file NIHMS1731494-supplement-1.pdf]

Supplement table. Estimates of between and within-person SAM effects on individual alcohol related consequences.

| Models based on all alcohol-use months contrasting SAM with alcohol-only                          |                                                                     |                    |                                                   |                    |
|---------------------------------------------------------------------------------------------------|---------------------------------------------------------------------|--------------------|---------------------------------------------------|--------------------|
| Consequence                                                                                       | Between-person effect of proportion of alcohol-us months SAM months |                    | Within-person effect of SAM in a particular month |                    |
|                                                                                                   | OR                                                                  | 95% CI             | OR                                                | 95% CI             |
| Hangover                                                                                          | 1.11                                                                | (0.69,1.80)        | <b>1.48</b>                                       | <b>(1.23,1.79)</b> |
| Sick to stomach                                                                                   | <b>1.75</b>                                                         | <b>(1.13,2.69)</b> | 1.17                                              | (0.96,1.43)        |
| Fatigue                                                                                           | <b>2.17</b>                                                         | <b>(1.30,3.61)</b> | <b>1.35</b>                                       | <b>(1.11,1.64)</b> |
| Did something embarrassing                                                                        | 1.73                                                                | (0.96,3.11)        | 1.19                                              | (0.98,1.46)        |
| Took foolish risk                                                                                 | 0.91                                                                | (0.48,1.75)        | <b>2.19</b>                                       | <b>(1.67,2.87)</b> |
| Did something regretted                                                                           | 1.48                                                                | (0.80,2.74)        | <b>1.50</b>                                       | <b>(1.17,1.92)</b> |
|                                                                                                   |                                                                     |                    |                                                   |                    |
| Models based on months in which both alcohol and marijuana were used and contrasting SAM with CAM |                                                                     |                    |                                                   |                    |
| Consequence                                                                                       | Between-person effect of proportion of months SAM months            |                    | Within-person effect of SAM in a particular month |                    |
|                                                                                                   | OR                                                                  | 95% CI             | OR                                                | 95% CI             |
| Hangover                                                                                          | 1.23                                                                | (0.63,2.41)        | <b>1.53</b>                                       | <b>(1.22,1.93)</b> |
| Sick to stomach                                                                                   | 0.98                                                                | (0.52,1.86)        | 1.18                                              | (0.93,1.50)        |
| Fatigue                                                                                           | <b>2.51</b>                                                         | <b>(1.24,5.07)</b> | 1.05                                              | (0.83,1.34)        |
| Did something embarrassing                                                                        | 1.68                                                                | (0.78,3.64)        | <b>1.41</b>                                       | <b>(1.09,1.82)</b> |
| Took foolish risk                                                                                 | 0.76                                                                | (0.30,1.94)        | <b>1.76</b>                                       | <b>(1.28,2.43)</b> |
| Did something regretted                                                                           | 0.84                                                                | (0.35,2.05)        | 1.32                                              | (0.95,1.82)        |

Note. SAM=simultaneous alcohol and marijuana; CAM=concurrent alcohol and marijuana but not simultaneous use. Bold typeface indicates  $p<.05$ . Models include same covariates included in models predicting number of alcohol-related consequence as shown in Table 2.
